# Supplementary material for: The Role of Intestinal Dysbacteriosis Induced Arachidonic Acid Metabolism Disorder in Inflammaging in Atherosclerosis
Source: PubMed Central journal article supplement (PMC8012722; doi:10.3389/fcimb.2021.618265), 2021-03-18
Supplement: DataSheet_1.pdf [file DataSheet_1.pdf]

## Supplementary Materials

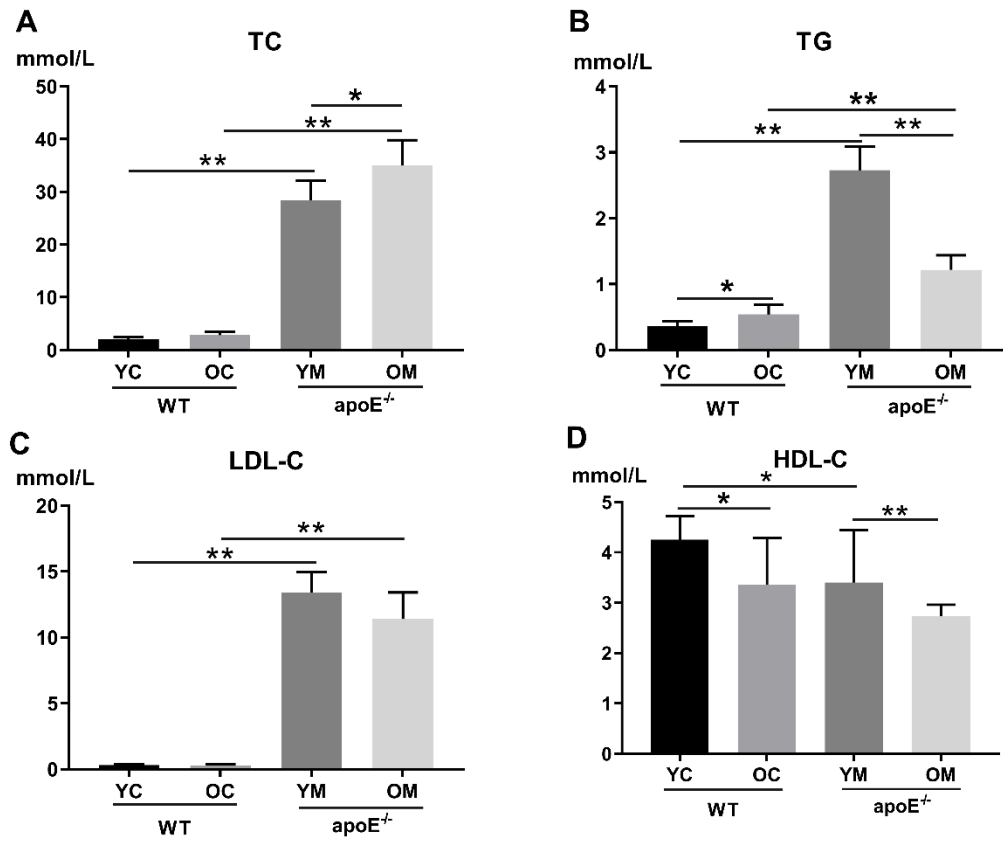

**Fig. S1:** Quantification of serum lipid profile, n=6 each group. (A) TC; (B) TG; (C) LDL-C; (D) HDL-C. Data were shown as mean  $\pm$  SD. \*  $p < 0.05$ ; \*\*  $p < 0.01$ .  $p$  values are calculated from T-test.

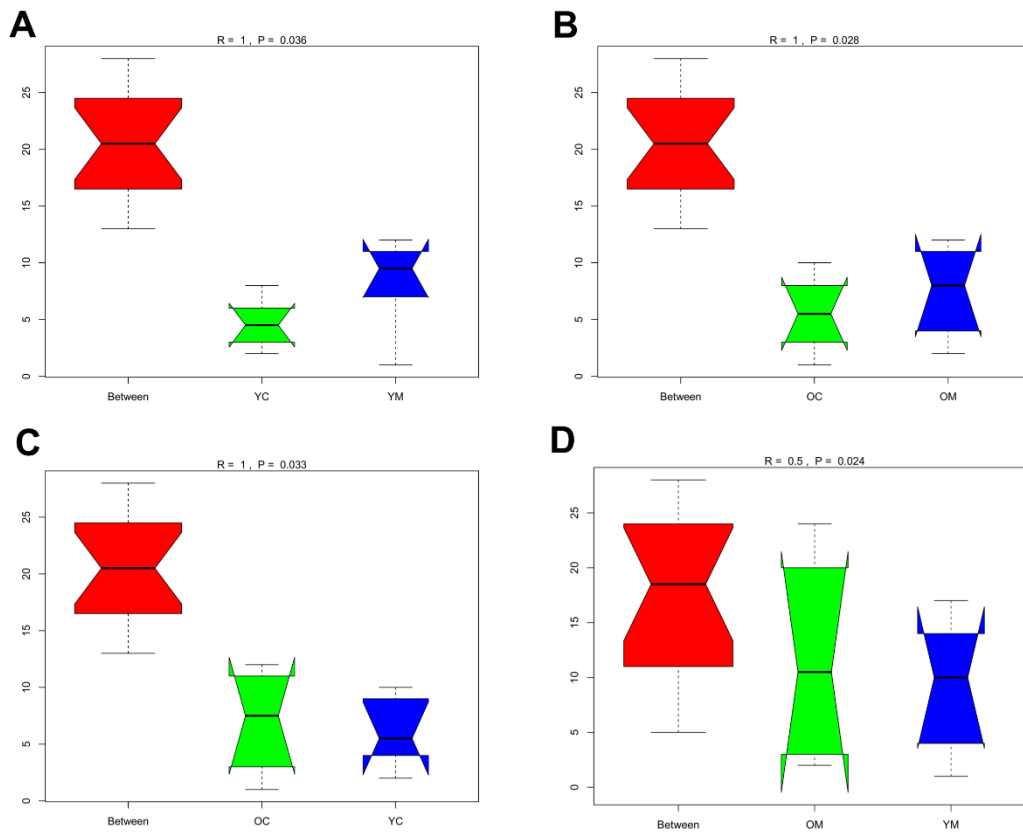

**Fig. S2:** The ANOSIM which generates an R test statistic stretching from  $-1$  to  $1$  was used to measure clustering of samples. A positive R value indicates greater within-group similarity than between-group similarity, Greater R value suggests stronger clustering of samples. An R value of  $0$  indicates no clustering of samples, yet a negative R value suggests greater between-group resemblance than within-group similarity.

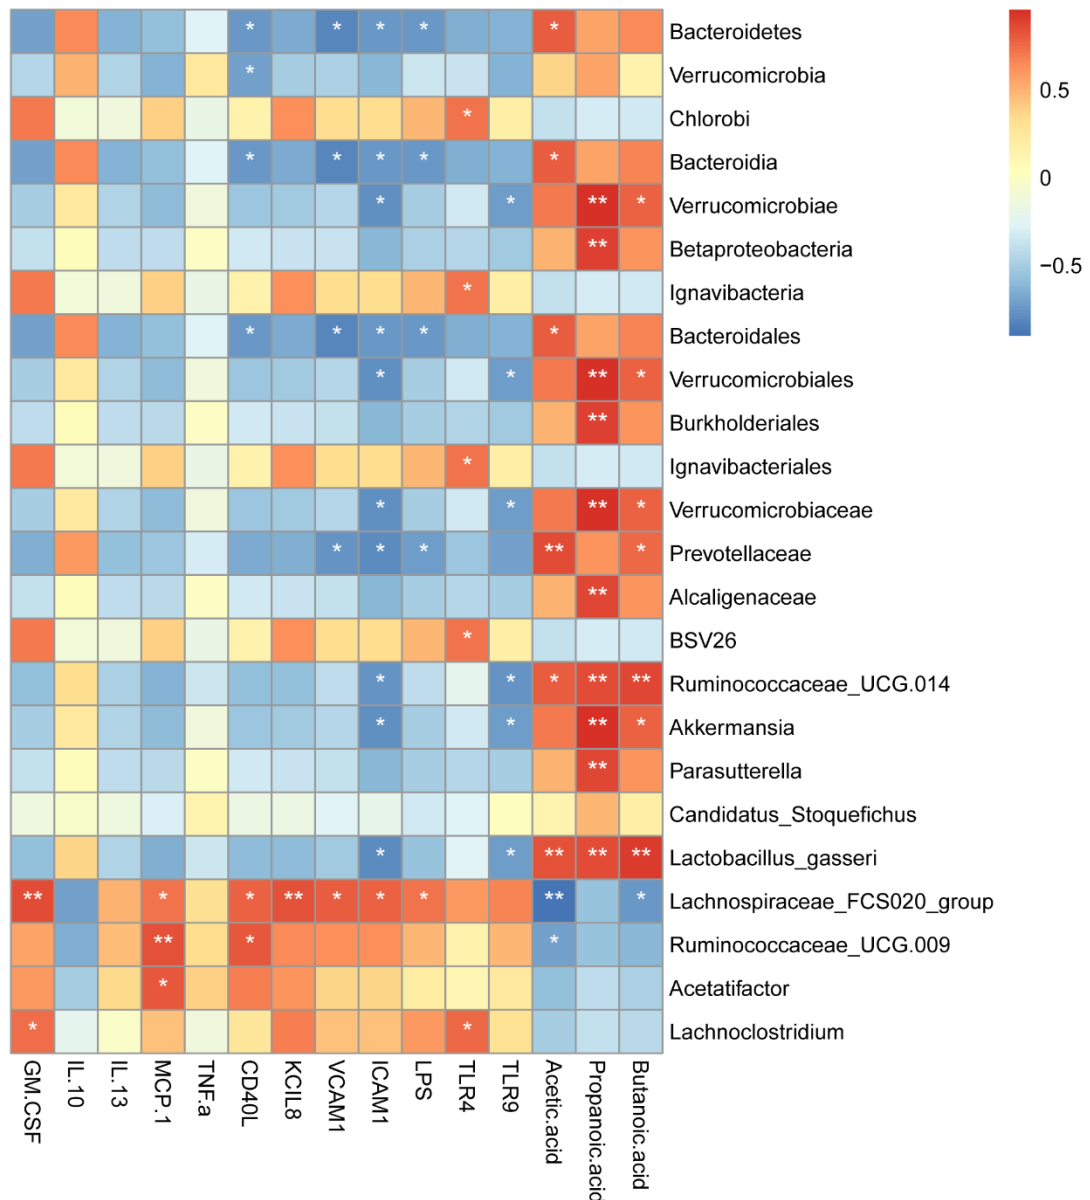

**Fig. S3:** Correlation analysis between specific microflora with serum levels of LPS and inflammatory cytokines, with faecal levels of SCFAs, TLR4 and TLR9, with inflammatory cytokines ICAM-1, VCAM-1 in AS plaques. \*p < 0.05; \*\*p < 0.01. p values are calculated by Pearson Correlation Coefficient, n=4.

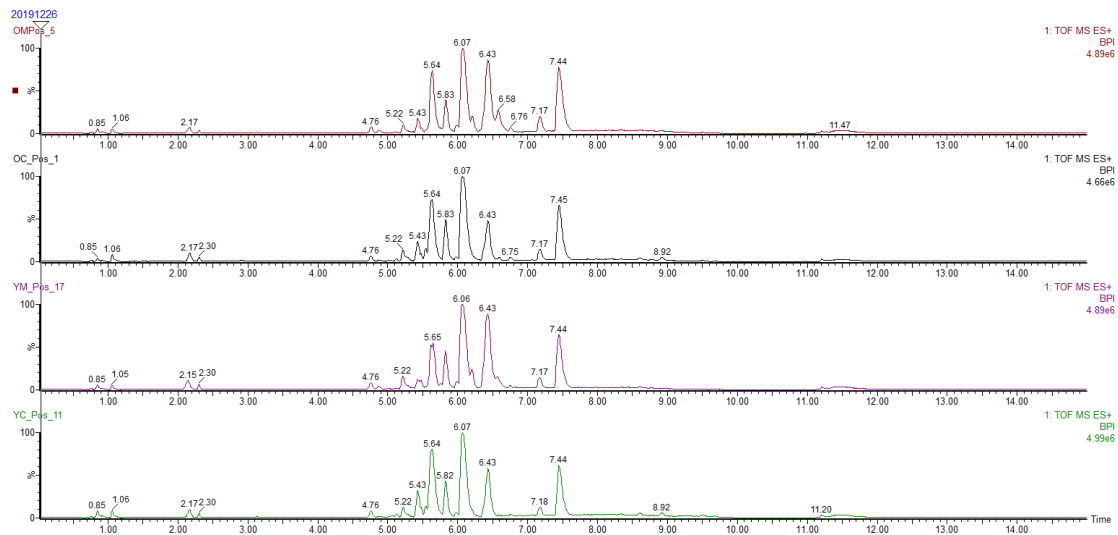

**Fig. S4.** Comparison of positive ion mode analysis to serum samples from four groups.

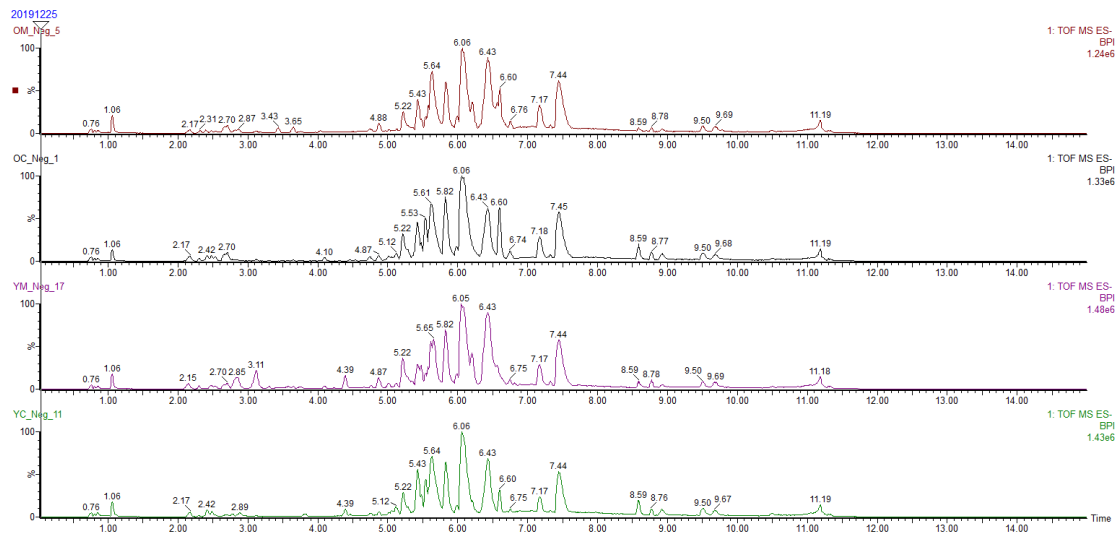

**Fig. S5.** Comparison of negative ion mode analysis to serum samples from four groups.

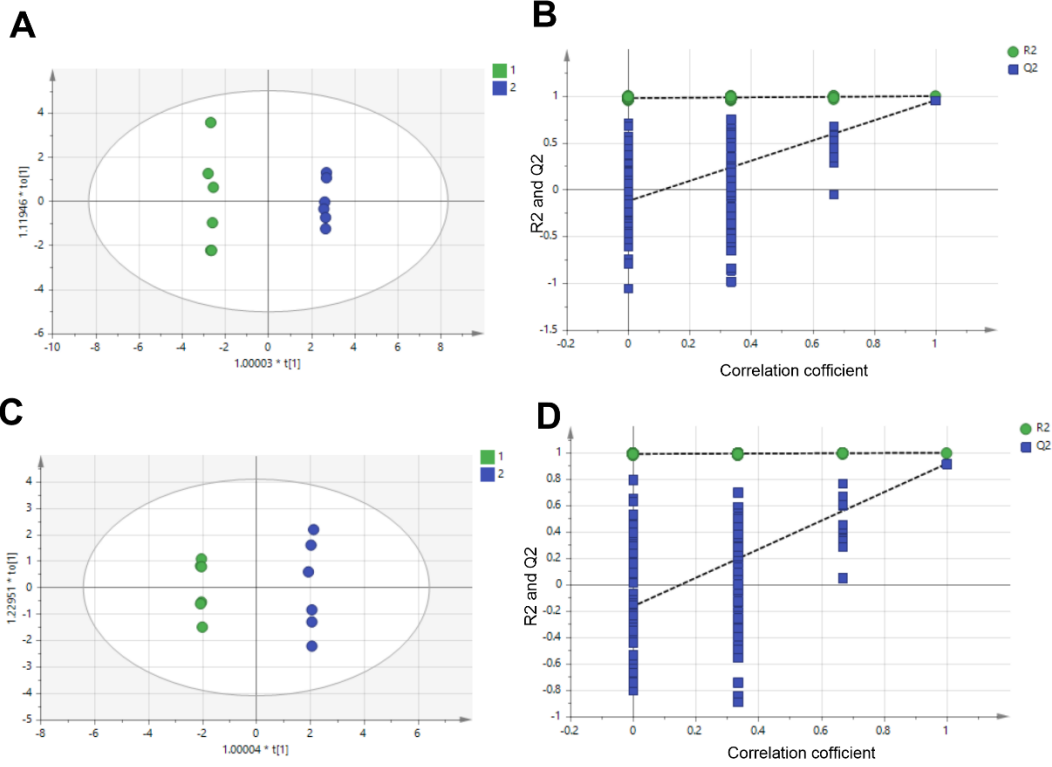

**Fig. S6.** PLS-DA plots and validation plots for discriminating YC (1) and YM (2) in ESI+ and ESI- modes. (A) PLS-DA plot in ESI+ mode; (B) validation plot in ESI+ mode; (C) PLS-DA plot in ESI- mode; (D) validation plot in ESI- mode.

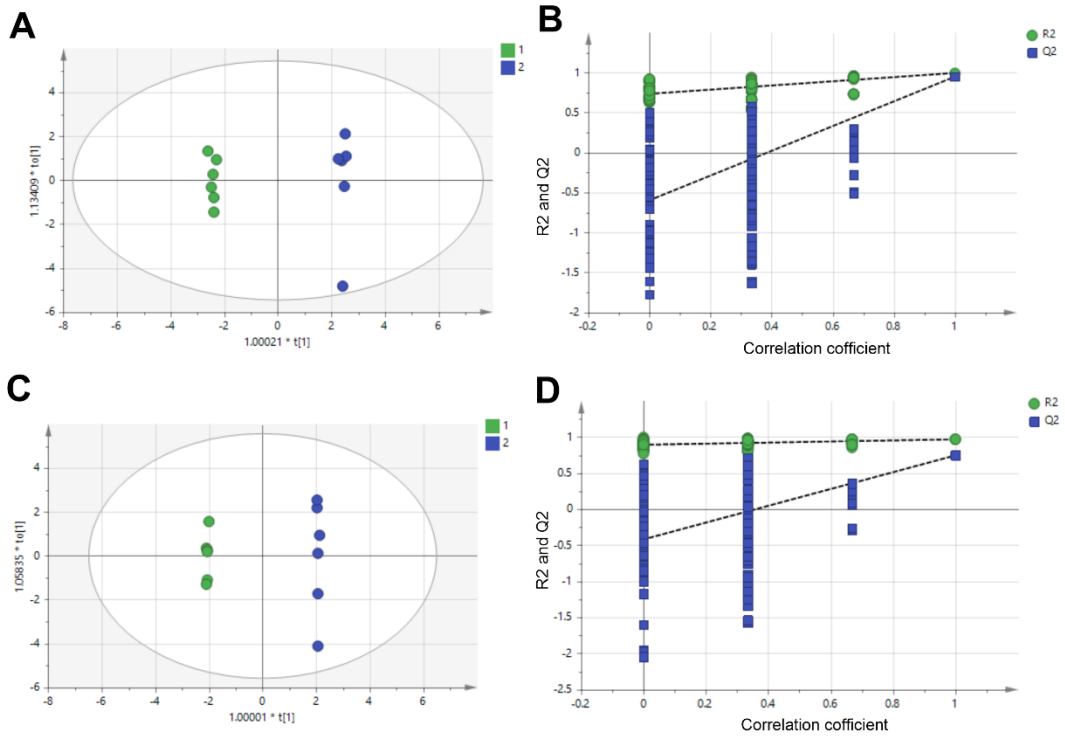

**Fig. S7.** PLS-DA plots and validation plots for discriminating OC (1) and OM (2) in ESI+ and ESI- modes.

ESI+ and ESI- modes. (A) PLS-DA plot in ESI+ mode; (B) validation plot in ESI+ mode; (C) PLS-DA plot in ESI- mode; (D) validation plot in ESI- mode.

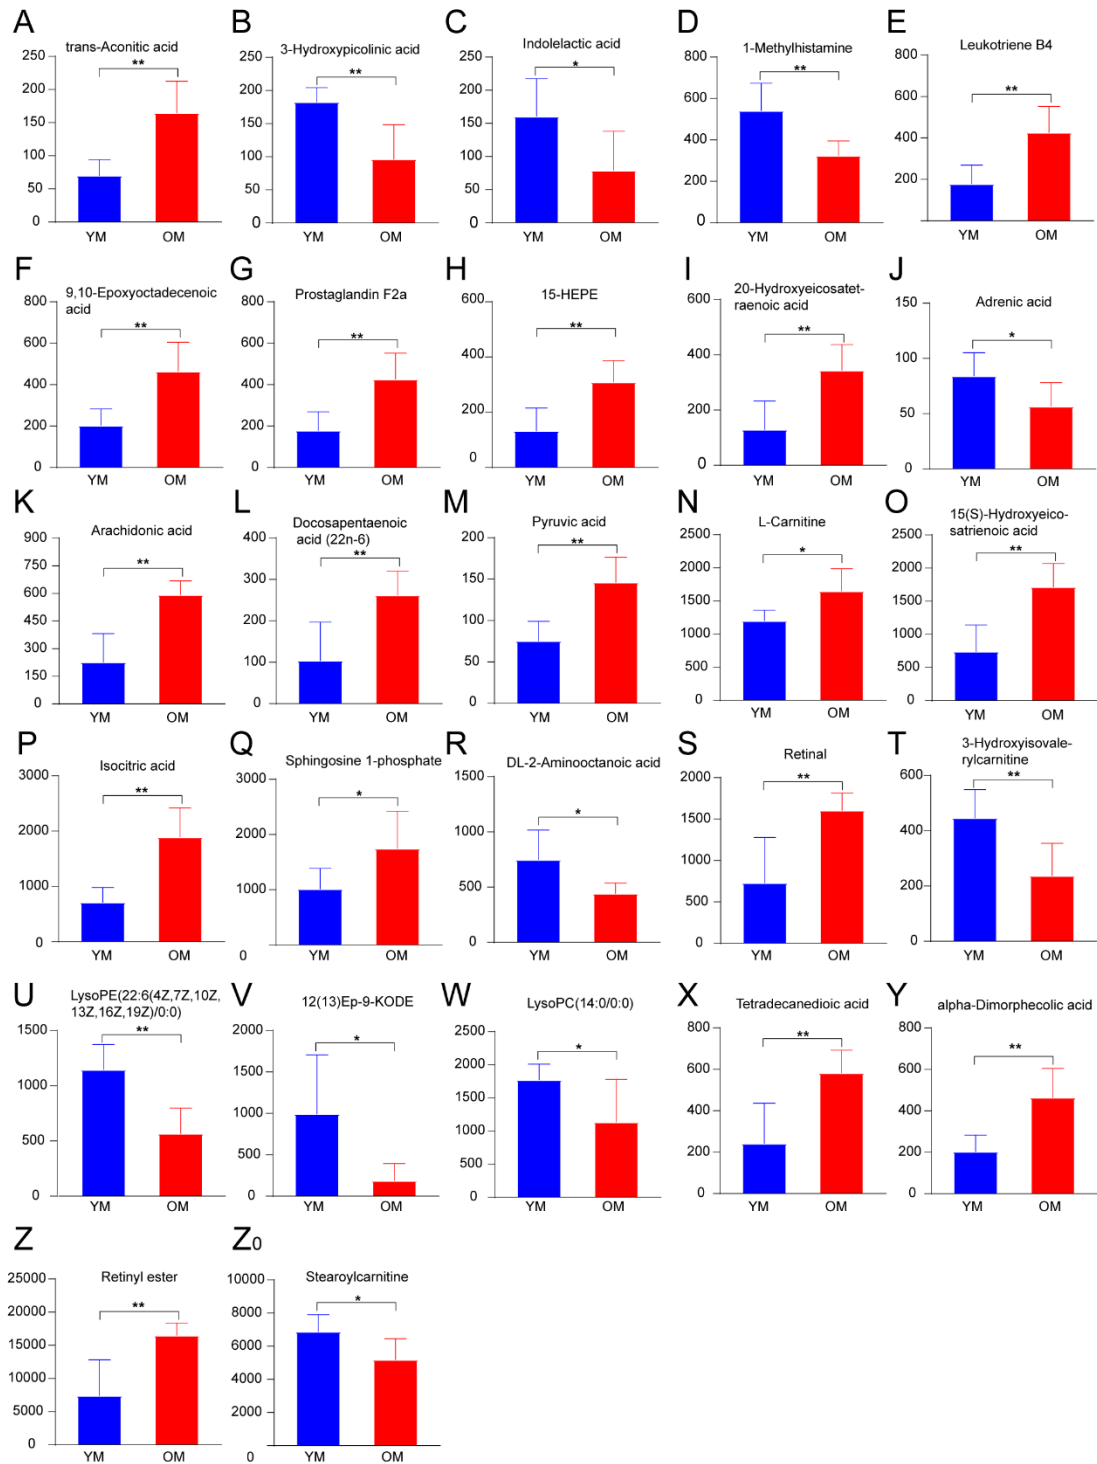

**Fig. S8.** Peak area of AS biomarkers in YM and OM groups in positive ion and negative ion modes: (A-Z<sub>0</sub>). Data were shown as mean ± SD. \*  $p < 0.05$ ; \*\*  $p < 0.01$ .  $p$  values are calculated from T-test,  $n=6$ .

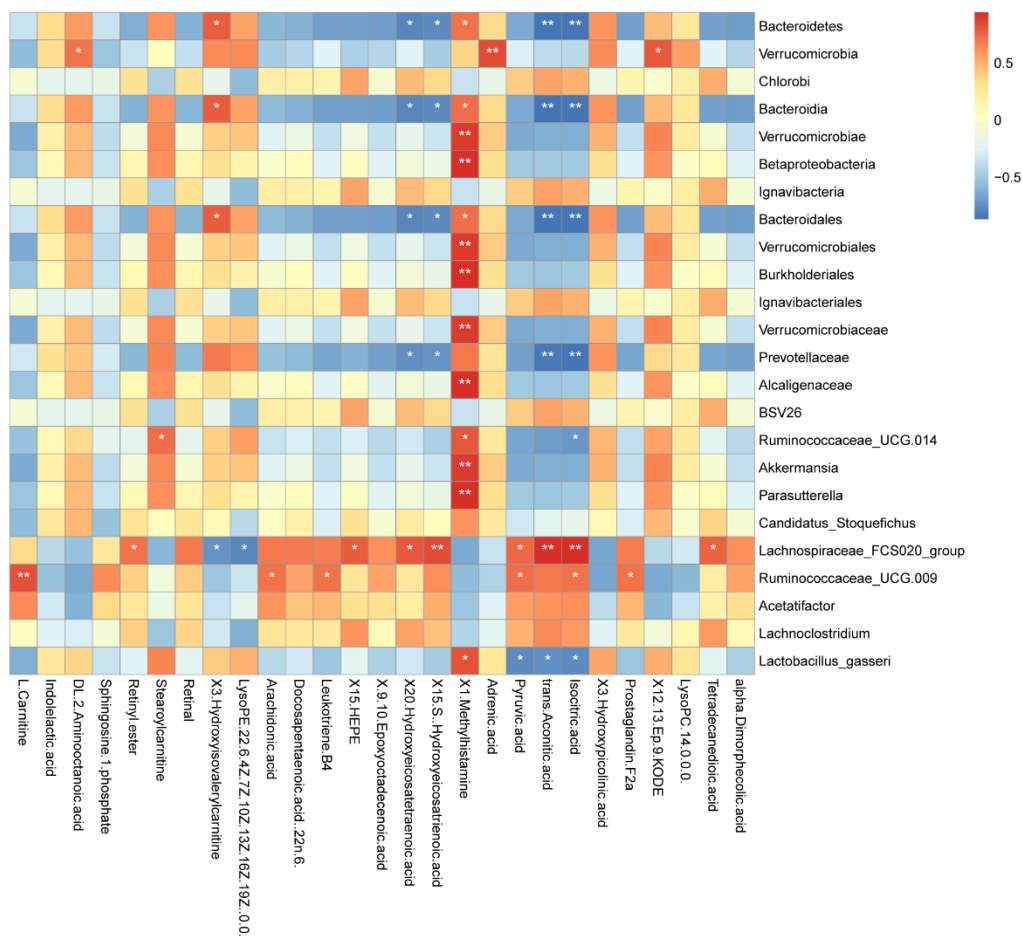

**Fig. S9.** Correlation analysis between the specific microflora with serum differential metabolites. Data were shown as mean  $\pm$  SD. \*  $p < 0.05$ ; \*\*  $p < 0.01$ .  $p$  values are calculated by Pearson Correlation Coefficient,  $n=4$ .

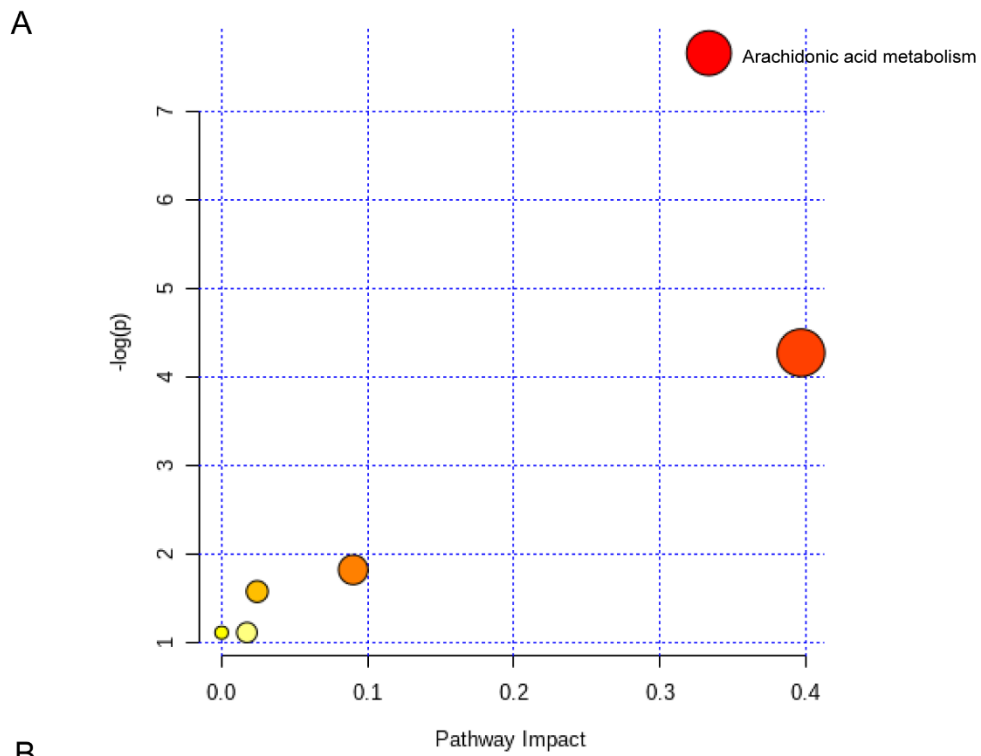

**Fig. S10.** Summary of pathway analysis and network analysis. (Red labeled metabolites: potential biomarkers with increased levels in OM group, compared to that in YM group.)
